# Supplementary material
Source: ML conference proceedings conference paper supplement (https://openreview.net/forum?id=7ZcePvChS7u)
Supplement: supplementary_material [file attachment]

## Video Link

Click here for video:

<https://www.youtube.com/watch?v=5KLGrvrPjMc>

# **Human-Robot Commensality:**

## **Bite Timing Prediction for Robot-Assisted Feeding in Groups**

Jan Ondras<sup>\*1</sup>, Abrar Anwar<sup>\*2</sup>, Tong Wu<sup>\*3</sup>, Fanjun Bu<sup>1</sup>, Malte Jung<sup>2</sup>, Jorge J. Ortiz<sup>3</sup>, Tapomayukh Bhattacharjee<sup>1</sup>

<sup>1</sup>Cornell University <sup>2</sup>University of Southern California <sup>3</sup>Rutgers University
